# Supplementary material for: Fabrication of Polymer Optical Fibre (POF) Gratings
Source: PubMed Central journal article supplement (PMC5375797; doi:10.3390/s17030511), 2017-03-04
Supplement: sensors-17-00511-s001.pdf [file sensors-17-00511-s001.pdf]

Supporting Information

# Fabrication of Polymer Optical Fibre (POF) Gratings

Yanhua Luo<sup>1,2</sup>, Binbin Yan<sup>3</sup>, Qijin Zhang<sup>4</sup>, Gang-Ding Peng<sup>1,\*</sup>, Jianxiang Wen<sup>5</sup> and Jianzhong Zhang<sup>6</sup>

<sup>1</sup> Photonics & Optical Communications, School of Electrical Engineering and Telecommunications, University of New South Wales, Sydney, NSW 2052, Australia; [yanhua.luo1@unsw.edu.au](mailto:yanhua.luo1@unsw.edu.au); [g.peng@unsw.edu.au](mailto:g.peng@unsw.edu.au)

<sup>2</sup> State Key Laboratory for Modification of Chemical Fibers and Polymer Materials, Donghua University, Shanghai 201600, China;

<sup>3</sup> State Key Laboratory of Information Photonics and Optical Communications, Beijing University of Posts and Telecommunications, Beijing 100876, China; [yanbinbin@bupt.edu.cn](mailto:yanbinbin@bupt.edu.cn)

<sup>4</sup> CAS Key Laboratory of Soft Matter Chemistry, Department of Polymer Science and Engineering, University of Science and Technology of China, Hefei, Anhui 230026, China; [zqjm@ustc.edu.cn](mailto:zqjm@ustc.edu.cn)

<sup>5</sup> Key Laboratory of Specialty Fiber Optics and Optical Access Networks, Shanghai University, Shanghai 200072, China; [wenjx@shu.edu.cn](mailto:wenjx@shu.edu.cn)

<sup>6</sup> Key Lab of In-fiber Integrated Optics, Ministry of Education, Harbin Engineering University, Harbin 150001, China; [zhangjianzhong@hrbeu.edu.cn](mailto:zhangjianzhong@hrbeu.edu.cn)

\* Correspondence: [g.peng@unsw.edu.au](mailto:g.peng@unsw.edu.au); Tel.: +61-2-9385 4014

Table S1. POF materials and their photosensitivity

| Core                     | Cladding         | Dopant                 | POF         | Source                              | Power                    | Time     | $\Delta n$                  | Mechanism                                 | Ref     |
|--------------------------|------------------|------------------------|-------------|-------------------------------------|--------------------------|----------|-----------------------------|-------------------------------------------|---------|
| PMMA                     | -                | -                      | -           | 325 nm UV laser                     | 6 mW (focused)           | -        | $3 \times 10^{-3}$          | photoinduced cross linking                | [1]     |
| Poly(BzMA-co-MMA)        | P(EMA-co-MMA)    | fluorescein (170ppm)   | two core SI | 514 nm Ar <sup>+</sup> laser        | 0.36-1.08 mW             | 62 mins  | $3.3 \times 10^{-5}$        | -                                         | [2]     |
| Poly(BzMA-co-MMA)        | P(EMA-co-MMA)    | fluorescein (170ppm)   | two core SI | OPO pulsed laser @ 248, 280, 325 nm | -                        | -        | -                           | -                                         | [2]     |
| Poly(BzMA-co-MMA)        | P(EMA-co-MMA)    | Rhodamine 6G           | MM SI       | 325 nm OPO pulsed laser             | -                        | -        | -                           | -                                         | [3]     |
| Poly(MMA-co-EMA-co-BzMA) | PMMA             | -                      | SM SI       | 325 nm OPO pulsed laser             | -                        | -        | $10^{-4}$                   | photo cross-linking & photopolymerization | [4]     |
| CYTOP                    | -                | -                      | -           | 355 nm Nd:YAG laser                 | 350 mJ                   | 20 mins  | $3 \times 10^{-4}$          | -                                         | [5]     |
| PMMA                     | -                | azobenzene dye(800ppm) | MM SI       | 532nm Nd:YVO <sub>4</sub> laser     | 87mW/cm <sup>2</sup>     | 60mins   | $3 \times 10^{-5}$          | photo induced birefringence               | [6-7]   |
| Poly(MMA-co-EMA-co-BzMA) | PMMA             | -                      | SM SI       | 325nm OPO pulsed laser              | -                        | 85 mins  | $1 \times 10^{-3}$          | -                                         | [8-10]  |
| PMMA                     | -                | -                      | -           | 800nm 40 fs Ti:sapphire             | 1 J/cm <sup>2</sup>      | -        | $5 \times 10^{-4}$          | -                                         | [11]    |
| Poly(MMA-co-CAMA)        | Poly(MMA-co-BA)  | CAMA (3-4 wt%)         | SI          | 532 nm Nd:YVO <sub>4</sub> laser    | -                        | -        | -                           | photo-induced birefringence               | [12-15] |
| Poly(MMA-co-EMA-co-BzMA) | Poly(MMA-co-BMA) | TSB (0.66wt%)          | MM SI       | 325 nm laser                        | 0.208 W/ cm <sup>2</sup> | 10 mins  | $-3 \times 10^{-4}$         | photoisomerization                        | [16]    |
| PMMA (doped DPS 0.5%)    | PMMA             | Photosol 7-049 (0.5%)  | MM GI       | 501.7 nm Ar laser                   | 4 mW                     | -        | -                           | optical ring cleavage                     | [17]    |
| Poly(MMA-co-EMA-co-BzMA) | PMMA             | -                      | SM SI       | 325 nm OPO laser                    | 4.5 mJ                   | 450 mins | $2.6 \times 10^{-4}$        | -                                         | [18]    |
| Poly(MMA-co-MVK-co-BzMA) | PMMA             | MVK (8wt%)             | FM SI       | UV mercury lamp                     | 0.3 mW/cm <sup>2</sup>   | 200 s    | $6 \times 10^{-3}$ (10 wt%) | photodegradation                          | [19]    |

| Core                     | Cladding         | Dopant            | POF             | Source                             | Power                   | Time    | $\Delta n$           | Mechanism                                         | Ref     |
|--------------------------|------------------|-------------------|-----------------|------------------------------------|-------------------------|---------|----------------------|---------------------------------------------------|---------|
| PMMA                     | -                | -                 | FM & SM<br>mPOF | 325 nm He-Cd<br>laser              | -                       | 60 mins | -                    | -                                                 | [20]    |
| Poly(BzMA-co-MMA)        | P(EMA-co-MMA)    | -                 | SI              | 325 nm He-Cd<br>laser              | 30 mW                   | -       | -                    | -                                                 | [21-22] |
| PMMA                     | -                | -                 | SM SI           | 387 nm Ti:<br>sapphire fs<br>laser | 0.8J/cm <sup>2</sup>    | -       | 2×10 <sup>-3</sup>   | polymer backbone cleavage<br>& monomer production | [23-25] |
| Poly(MMA-co-CAMA)        | Poly(MMA-co-BA)  | CAMA<br>(3.2 wt%) | SI              | 421.8 nm He-<br>Cd laser           | -                       | -       | -                    | photoinduced birefringence                        | [26-27] |
| PMMA                     | -                | -                 | MM & SM<br>SI   | 400 nm fs laser                    | 80-100nJ                | -       | -                    | index change via 2-photon<br>absorption           | [28]    |
| PMMA-co-PS (5% PS)       | PMMA             | -                 | SM SI           | 308 nm XeCl<br>excimer laser       | 85 mJ/cm <sup>2</sup>   | 60 mins | -                    | -                                                 | [29]    |
| Poly(MMA-co-EMA-co-BzMA) | Poly(MMA-EMA)    | -                 | SM SI           | 308 nm XeCl<br>excimer laser       | 70 mJ/cm <sup>2</sup>   | 17 mins | -                    | -                                                 | [29]    |
| PMMA                     | -                | -                 | POF             | 800 nm fs laser                    | 60 nJ                   | -       | -                    | refractive index<br>modifications                 | [30]    |
| PMMA                     | -                | -                 | mPOF            | 325 nm He-Cd<br>laser              | 30 mW                   | -       | -                    | -                                                 | [31-32] |
| PMMA                     | -                | -                 | -               | 387 nm fs laser                    | 0.446 J/cm <sup>2</sup> | -       | 5×10 <sup>-5</sup>   | depolymerization and<br>crosslinking              | [33]    |
| Poly(MMA-co-EMA-co-BzMA) | Poly(MMA-co-EMA) | BDK<br>(2wt%)     | MM & SM<br>SI   | 355 nm<br>Nd:YAG                   | 0.673 W/cm <sup>2</sup> | 16 mins | 4.5×10 <sup>-5</sup> | polymerization<br>photolock &<br>photodegradation | [34]    |
| Poly(MMA-co-EMA-co-BzMA) | Poly(MMA-co-BMA) | TSB<br>(1wt%)     | MM SI           | 325 nm laser                       | -                       | 15 mins | 1.5×10 <sup>-5</sup> | photoisomerization                                | [35]    |
| PMMA                     | -                | -                 | MM<br>mPOF      | 325 nm He-Cd<br>laser              | 30 mW                   | -       | -                    | -                                                 | [36-38] |
| Poly(MMA-co-EMA-co-BzMA) | Poly(MMA-co-BMA) | TSB<br>(1wt%)     | MM SI           | 325 nm laser                       | -                       | -       | -                    | photoisomerization                                | [39]    |

| Core                     | Cladding         | Dopant        | POF       | Source                   | Power                  | Time       | $\Delta n$           | Mechanism                                     | Ref     |
|--------------------------|------------------|---------------|-----------|--------------------------|------------------------|------------|----------------------|-----------------------------------------------|---------|
| COC                      | -                | -             | FM mPOF   | 325 nm He-Cd laser       | 30 mW                  | 30-40 mins | -                    | -                                             | [40]    |
| COC                      | -                | -             | SM mPOF   | 325 nm He-Cd laser       | 30 mW                  | -          | -                    | -                                             | [41]    |
| COC                      | -                | -             | mPOF      | 325 nm He-Cd laser       | 5 W/cm <sup>2</sup>    | 300 mins   | -                    | -                                             | [42]    |
| PMMA                     | -                | -             | FM mPOF   | 325 nm He-Cd laser       | -                      | 185 mins   | -                    | -                                             | [43]    |
| PMMA-co-PS (5% PS)       | PMMA             | -             | FM SI     | 325 nm He-Cd laser       | -                      | 60 mins    | -                    | -                                             | [43]    |
| COC                      | -                | -             | mPOF      | 325 nm He-Cd laser       | 5 W/cm <sup>2</sup>    | 338 mins   | 1.5×10 <sup>-5</sup> | -                                             | [44]    |
| Poly(MMA-co-BA-co-VA)    | Poly(MMA-co-BA)  | VA (0.2 mol%) | FM SI     | 355 nm laser             | 10 mW                  | -          | 8.0×10 <sup>-4</sup> | photo-crosslinking                            | [45-46] |
| PMMA                     | -                | BDK           | mPOF      | 325 nm He-Cd laser       | 2.65 W/cm <sup>2</sup> | 13 mins    | 3.2×10 <sup>-4</sup> | polymerization, photolock, & photodegradation | [47]    |
| COC                      | -                | -             | -         | 248 nm KrF excimer laser | -                      | 30 s       | -                    | -                                             | [48]    |
| COC                      | -                | -             | -         | 248 nm KrF excimer laser | -                      | 8 s        | -                    | -                                             | [48]    |
| PMMA                     | -                | -             | mPOF      | 800 nm fs laser          | -                      | 2.5 s      | -                    | -                                             | [49-50] |
| PMMA                     | -                | -             | mPOF      | 325 nm He-Cd laser       | -                      | -          | -                    | -                                             | [51]    |
| PMMA                     | -                | -             | -         | 325 nm He-Cd laser       | -                      | -          | -                    | -                                             | [52]    |
| CYTOP                    | PMMA             | -             | MM GI     | 355 nm Nd:YAG laser      | -                      | -          | -                    | -                                             | [53]    |
| PMMA-co-PS (5% PS)       | PMMA             | -             | SM SI     | 248 nm laser             | 0.5 mJ/cm <sup>2</sup> | -          | -                    | -                                             | [54]    |
| Poly(MMA-co-EMA-co-BzMA) | Poly(MMA-co-EMA) | -             | micro POF | 325 nm He-Cd laser       | 50 mW                  | 3 mins     | -                    | -                                             | [55]    |

| Core                     | Cladding         | Dopant     | POF          | Source                   | Power                 | Time    | $\Delta n$           | Mechanism                                 | Ref     |
|--------------------------|------------------|------------|--------------|--------------------------|-----------------------|---------|----------------------|-------------------------------------------|---------|
| PMMA                     | -                | -          | SM POF       | 325 nm He-Cd laser       | 30 mW                 | -       | -                    |                                           | [56]    |
| PMMA                     | -                | -          | SM mPOF      | 325 nm He-Cd laser       | 30 mW                 | -       | -                    |                                           | [57-59] |
| PMMA-co-PS (5% PS)       | PMMA             | -          | SM SI POF    | 325 nm He-Cd laser       | 30 mW                 | -       | -                    |                                           | [57-59] |
| PMMA                     | -                | -          | SM mPOF      | 325 nm He-Cd laser       | 30 mW                 | -       | -                    |                                           | [57-59] |
| PMMA-co-PS (5% PS)       | PMMA             | -          | SM SI POF    | 325 nm He-Cd laser       | 30 mW                 | -       | -                    |                                           | [57-59] |
| PMMA                     | -                | -          | SM & MM mPOF | 325 nm He-Cd laser       | 30 mW                 | -       | -                    |                                           | [57-59] |
| PMMA                     | -                | -          | mPOF         | 325 nm He-Cd laser       | 30 mW                 | 7 mins  | -                    | -                                         | [60-61] |
| CYTOP                    | ?                | -          | MM GI        | 248 nm KrF excimer laser | 5k J/cm <sup>2</sup>  | -       | -                    | -                                         | [62]    |
| PMMA                     | -                | -          | mPOF         | 325 nm He-Cd laser       | 900 kW/m <sup>2</sup> | -       | 8.5×10 <sup>-3</sup> | Photodegradation & further polymerization | [63-64] |
| PMMA                     | -                | TSB        | mPOF         | 325 nm He-Cd laser       | 30 mW                 | 42 s    | -                    | photobleaching due to high absorption     | [65]    |
| PMMA(doped DPS 5 mol%)   | PMMA             | TSB (1wt%) | SI POF       | 325 nm He-Cd laser       | -                     | -       | -                    | photoisomerization                        | [66]    |
| PMMA(doped DPS 5 mol%)   | PMMA             | TSB (1wt%) | SI POF       | 325 nm He-Cd laser       | -                     | -       | -                    | photoisomerization                        | [67]    |
| Poly(MMA-co-EMA-co-BzMA) | Poly(MMA-co-EMA) | -          | SM SI        | 325 nm He-Cd laser       | 50 mW                 | -       | -                    |                                           | [68]    |
| CYTOP                    | PMMA             | -          | MM GI        | 325 nm He-Cd laser       | 30 mW                 | 12 mins | -                    |                                           | [69]    |
| PMMA                     | -                | -          | SM mPOF      | 325 nm He-Cd laser       | 30 mW                 | 50 mins | -                    |                                           | [69]    |

| Core                     | Cladding          | Dopant     | POF           | Source             | Power                 | Time    | $\Delta n$           | Mechanism                            | Ref     |
|--------------------------|-------------------|------------|---------------|--------------------|-----------------------|---------|----------------------|--------------------------------------|---------|
| PC                       | -                 | -          | SM mPOF       | 325 nm He-Cd laser | 50 mW                 | -       | -                    | -                                    | [70]    |
| CYTOP                    | PE/PC             | -          | MM GI         | 517 nm fs laser    | ~80 nJ/pulse          | -       | $1.3 \times 10^{-4}$ | -                                    | [71-72] |
| COC (TOPAS 5013S-04)     | COC (ZEONEX 480R) | -          | SM SI         | 325 nm He-Cd laser | -                     | -       | -                    | -                                    | [73]    |
| PC                       | -                 | -          | SM mPOF       | 325 nm He-Cd laser | 4 mW                  | ~6 mins | -                    | -                                    | [74]    |
| PMMA                     | -                 | -          | SM mPOF       | 325 nm He-Cd laser | 30 mW                 | 15 mins | -                    | -                                    | [75-76] |
| PMMA                     | -                 | -          | SM mPOF       | 325 nm He-Cd laser | 20 mW                 | -       | -                    | -                                    | [77]    |
| PMMA                     | -                 | -          | FM mPOF       | 248 nm laser       | 33 mJ/cm <sup>2</sup> | 30 s    | $2.4 \times 10^{-4}$ | -                                    | [78]    |
| PMMA                     | -                 | -          | D-shape SM SI | 325 nm He-Cd laser | -                     | -       | -                    | -                                    | [79]    |
| PMMA                     | -                 | azobenzene | mPOF          | 325 nm He-Cd laser | 30 mW                 | 42 s    | -                    | photoblation due to high absorption  | [80]    |
| PMMA (doped DPS 5mol%)   | PMMA              | TSB (1wt%) | SI            | 800 nm fs laser    | 20 mW                 | 70 s    | -                    | index change via 2-photon absorption | [81]    |
| COC (TOPAS 5013S-04)     | COC (ZEONEX 480R) | -          | SM SI         | 325 nm He-Cd laser | 6 mW                  | 4 mins  | -                    | -                                    | [82]    |
| PMMA                     | -                 | -          | HiBi mPOF     | 248 nm KrF laser   | 33 mJ/cm <sup>2</sup> | -       | -                    | -                                    | [83]    |
| Poly(MMA-co-EMA-co-BzMA) | Poly(MMA-co-EMA)  | -          | micro POF     | 325 nm He-Cd laser | 50 mW                 | 7 s     | -                    | -                                    | [84]    |

2 Note: CAMA: 2-[4-[2-(4-cyano-phenyl)-diazenyl]-phenoxy]-ethyl methacrylate

### 3 References

- 4 1. Tomlinson, W. J.; Kaminow, I. P.; Chandross, E. A.; Fork, R. L.; Silfvast, W. T. Photoinduced refractive  
5 index increase in poly(methylmethacrylate) and its applications. *Appl. Phys. Lett.* **1970**, *16*, 486-489.
- 6 2. Chu, P. L.; Peng, G. D. Photosensitivities in germanium-doped planar waveguides and dye-doped  
7 polymer optical fibres. *Proc. SPIE* **1998**, *3470*, 120-127.
- 8 3. Peng, G. D.; Xiong, Z.; Chu, P. L. Photosensitivity and gratings in dye-doped polymer optical fibers. *Opt.*  
9 *Fiber Technol.* **1999**, *5*, 242-251.
- 10 4. Xiong, Z.; Peng, G. D.; Wu, B.; Chu, P. L. Highly tunable Bragg gratings in single-mode polymer optical  
11 fibers. *IEEE Photon. Technol. Lett.* **1999**, *11*, 352-354.
- 12 5. Liu, H. Y.; Peng, G. D.; Chu, P. L.; Koike, Y.; Watanabe, Y. Photosensitivity in low-loss perfluoropolymer  
13 (CYTOP) fibre material. *Electron. Lett.* **2001**, *37*, 347-348.
- 14 6. Xu, X.; Ming, H.; Ma, H.; Sun, X.; Cheng, W.; Ye, J.; Zhang, Q.; Xie, J. Birefringent gratings induced by  
15 polarized laser in azobenzene-doped poly(methyl methacrylate) optical fibers. *Proc. SPIE* **2001**, *4603*, 260-  
16 265.
- 17 7. Xu, X.; Ming, H.; Zhang, Q. Properties of polarized laser-induced birefringent gratings in azobenzene-  
18 doped poly(methyl methacrylate) optical fibers. *Opt. Commun.* **2002**, *204*, 137-143.
- 19 8. Liu, H. Y.; Peng, G. D.; Chu, P. L. Polymer fiber Bragg gratings with 28-dB transmission rejection. *IEEE*  
20 *Photon. Technol. Lett.* **2002**, *14*, 935-937.
- 21 9. Peng, G.-D.; Liu, H.; Chu, P. L. Dynamics and threshold behaviour in polymer fibre bragg grating  
22 creation. *Proc. SPIE* **2002**, *4803*, 164-178.
- 23 10. Peng, G.; Liu, H. Y.; Chu, P. L. Highly reflective polymer fiber bragg gratings and its growth dynamics. In  
24 *Optical Fiber Communications Conference, Anaheim, California, 17 Mar. 2002*; OSA.
- 25 11. Scully, P. J.; Jones, D.; Jaroszynski, D. A. Femtosecond laser irradiation of polymethylmethacrylate for  
26 refractive index gratings. *J. Opt. A-Pure Appl. Opt.* **2003**, *5*, S92-S96.
- 27 12. Ma, H.; Li, Z.-C.; Ming, H.; Zhang, Q.; Tam, H.-Y.; Zhang, Y.-S.; Zhang, T.; Wang, P.; Xie, J. Analysis of  
28 photosensitivity of copolymer optical fibre preform. *Chin. Phys. Lett.* **2004**, *21*, 2252-2254.
- 29 13. Li, Z.; Ma, H.; Zhang, Q.; Ming, H. Birefringence grating within a single mode polymer optical fibre with  
30 photosensitive core of azobenzene copolymer. *J. Optoelectron. Adv. Mater.* **2005**, *7*, 1039-1046.
- 31 14. Zheng, R. S.; Lu, Y. H.; Xie, Z. G.; Tao, J.; Lin, K. Q.; Ming, H. Surface plasmon resonance sensors based  
32 on polymer optical fiber. In *1st Asia-Pacific Optical Fiber Sensors Conference, Chengdu, China, 7-9 Nov.*  
33 *2008*; IEEE.
- 34 15. Luo, Y.; Li, Z.; Zheng, R.; Chen, R.; Yan, Q.; Zhang, Q.; Peng, G.; Ming, H.; Zhu, B. Birefringent  
35 azopolymer long period fiber gratings induced by 532 nm polarized laser. *Opt. Commun.* **2009**, *282*, 2384-  
36 2353.
- 37 16. Yu, J.; Tao, X.; Tam, H. Trans-4-stilbenemethanol-doped photosensitive polymer fibers and gratings. *Opt.*  
38 *Lett.* **2004**, *29*, 156-158.
- 39 17. Boxel, R. V.; Verbiest, T.; Persoons, A. Switchable Bragg gratings in photochromic doped graded-index  
40 polymer optical fibres. *Proc. SPIE* **2004**, *5279*, 77-84.
- 41 18. Liu, H. B.; Liu, H. Y.; Peng, G. D.; Chu, P. L. Novel growth behaviors of fiber Bragg gratings in polymer  
42 optical fiber under UV irradiation with low power. *IEEE Photon. Technol. Lett.* **2004**, *16*, 159-161.
- 43 19. Li, Z.; Tam, H. Y.; Xu, L.; Zhang, Q. Fabrication of long-period gratings in poly(methyl methacrylate-co-  
44 methyl vinyl ketone-co-benzyl methacrylate)-core polymer optical fiber by use of a mercury lamp. *Opt.*  
45 *Lett.* **2005**, *30*, 1117-1119.
- 46 20. Dobb, H.; Webb, D. J.; Kalli, K.; Argyros, A.; Large, M. C. J.; van Eijkelenborg, M. A. Continuous wave  
47 ultraviolet light-induced fiber Bragg gratings in few- and single-mode microstructured polymer optical  
48 fibers. *Opt. Lett.* **2005**, *30*, 3296-3298.
- 49 21. Webb, D. J.; Aressy, M.; Argyros, A.; Barton, J. S.; Dobb, H.; Eijkelenborg, M. A. v.; Fender, A.; Jones, J. D.  
50 C.; Kalli, K.; Kukureka, S.; Large, M. C. J.; MacPherson, W.; Peng, G. D.; Silva-López, M. Grating and  
51 interferometric devices in POF. In *14<sup>th</sup> International Polymer Optical Fibre Conference, Hong Kong, China,*  
52 *19-21 September 2005*; Optoelectronics Research Centre City Univeristy of Hong Kong, pp.325-328.
- 53 22. Dobb, H.; Carroll, K.; Webb, D. J.; Kalli, K.; Komodromos, M.; Themistos, C.; Peng, G. D.; Argyros, A.;  
54 Large, M. C. J.; Eijkelenborg, M. A. v.; Fang, Q.; Boyd, I. W. Grating based devices in polymer optical  
55 fibre. *Proc. SPIE* **2006**, *6189*, 618901-1-12.
- 56 23. Baum, A.; Scully, P. J.; Perrie, W. Femtosecond Laser Modification of Poly(methyl methacrylate) at 387 nm  
57 Wavelength In *Conference on Lasers and Electro-Optics*, Long Beach, California, 21 May 2006; OSA.
- 58 24. Baum, A.; Perrie, W.; Scully, P. J.; Basanta, M.; Thomas, C. L.; Goddard, N. J.; Fielden, P. R.; Chalker, P.  
59 Refractive index structures in poly(methyl methacrylate) and polymer optical fibre by femtosecond laser

- 60 irradiation in *optical fiber sensors*, Cancun, 23 Oct. 2006; OSA.
- 61 25. Baum, A.; Scully, P. J.; Basanta, M.; Paul Thomas, C. L.; Fielden, P. R.; Goddard, N. J.; Perrie, W.; Chalker,  
62 P. R. Photochemistry of refractive index structures in poly(methyl methacrylate) by femtosecond laser  
63 irradiation. *Opt. Lett.* 2007, *32*, 190-192.
- 64 26. Luo, Y.; Zhou, J.; Yan, Q.; Su, W.; Li, Z.; Zhang, Q.; Huang, J.; Wang, K. Optical manipulable polymer  
65 optical fiber Bragg gratings with azopolymer as core material. *Appl. Phys. Lett.* 2007, *91*, 071110.
- 66 27. Luo, Y.; Wu, W.; Yan, Q.; Zhang, Q.; Peng, G.-D. Reversible birefringent gratings in azo polymer optical  
67 fibre. In *The 18th International Conference on Plastic Optical Fibers*: Sydney, Australia, 9-11 Sep. 2009.
- 68 28. Liang, S. J.; Scully, P. J.; Schille, J.; Vaughan, J.; Perrie, W. Femtosecond laser induced refractive index  
69 structures in polymer optical fibre (POF) for sensing. *Proc. SPIE* 2009, *7503*, 75036S-1-4.
- 70 29. Terblanche, J.; Schmieder, D.; Meyer, J. Fibre Bragg gratings in polymer optical fibres at 980 nm. *Proc.*  
71 *SPIE* 2009, *7503*, 75037F-1-4.
- 72 30. Stecher, M.; Williams, R. J.; Bang, O.; Marshall, G. D.; Withford, M. J.; Town, G. E. Periodic refractive  
73 index modifications inscribed in polymer optical fibre by focussed femtosecond pulses, In *The 18th*  
74 *International Conference on Plastic Optical Fibers*: Sydney, Australia, 9-11 Sep. 2009.
- 75 31. Sáez-Rodríguez, D.; Muñoz, J. L. C.; Johnson, I.; Webb, D. J.; Large, M. C. J.; Argyros, A. Long period fibre  
76 gratings photoinscribed in a microstructured polymer optical fibre by UV radiation. *Proc. SPIE* 2009, *7357*,  
77 73570L-1-8.
- 78 32. Saez-Rodriguez, D.; Cruz, J. L.; Johnson, I.; Webb, D. J.; Large, M. C. J.; Argyros, A. Water diffusion into  
79 UV inscribed long period grating in microstructured polymer fiber. *IEEE Sens. J.* 2010, *10*, 1169-1173.
- 80 33. Baum, A.; Scully, P. J.; Perrie, W.; Liu, D.; Lucarini, V. Mechanisms of femtosecond laser-induced  
81 refractive index modification of poly(methyl methacrylate). *J. Opt. Soc. Am. B-Opt. Phys.* 2010, *27*, 107-111.
- 82 34. Luo, Y.; Zhang, Q.; Liu, H.; Peng, G. Grating fabrication in benzildimethylketal doped photosensitive  
83 polymer fibers using 355 nm nanosecond pulsed laser. *Opt. Lett.* 2010, *35*, 751-753.
- 84 35. Zhang, Z. F.; Zhang, C.; Tao, X. M.; Wang, G. F.; Peng, G. D. Inscription of polymer optical fiber bragg  
85 grating at 962 nm and its potential in strain sensing. *IEEE Photon. Technol. Lett.* 2010, *22*, 1562-1564.
- 86 36. Johnson, I. P.; Webb, D. J.; Kalli, K.; Large, M. C. J.; Argyros, A. Multiplexed FBG sensor recorded in  
87 multimode microstructured polymer optical fibre. *Proc. SPIE* 2010, *7714*, 77140D-1-10.
- 88 37. Johnson, I. P.; Webb, D. J.; Kalli, K. Utilisation of thermal annealing to record multiplexed FBG sensors in  
89 multimode microstructured polymer optical fibre. *Proc. SPIE* 2010, *7753*, 77536T-1-4.
- 90 38. Johnson, I. P.; Webb, D. J.; Kalli, K.; Yuan, W.; Stefani, A.; Nielsen, K.; Rasmussen, H. K.; Bang, O.  
91 Polymer PCF Bragg grating sensors based on poly(methyl methacrylate) and TOPAS cyclic olefin  
92 copolymer. *Proc. SPIE* 2011, *8073*, 80732V-1-8.
- 93 39. Sun, X.; Tao, X.; Zhang, Z. The investigation on photosensitivity of polymer optical fiber. In *2011*  
94 *Symposium on Photonics and Optoelectronics*, Wuhan, China, 16-18 May 2011; IEEE.
- 95 40. Zhang, C.; Webb, D.; Kalli, K.; Emilianov, G.; Bang, O.; Kjær, E. Bragg grating inscription in TOPAS  
96 microstructured polymer optical fibre. In *16th International Conference on Plastic Optical Fibers*, Turin,  
97 Italy, 10-12 Sep. 2007.
- 98 41. Johnson, I. P.; Yuan, W.; Stefani, A.; Nielsen, K.; Rasmussen, H. K.; Khan, L.; Webb, D. J.; Kalli, K.; Bang,  
99 O. Optical fibre Bragg grating recorded in TOPAS cyclic olefin copolymer. *Electron. Lett.* 2011, *47*, 271-272.
- 100 42. Yuan, W.; Khan, L.; Webb, D. J.; Kalli, K.; Rasmussen, H. K.; Stefani, A.; Bang, O. Humidity insensitive  
101 TOPAS polymer fiber Bragg grating sensor. *Opt. Express* 2011, *19*, 19731-19739.
- 102 43. Stefani, A.; Yuan, W.; Markos, C.; Bang, O. Narrow bandwidth 850 nm fiber Bragg gratings in few-mode  
103 polymer optical fibers. *IEEE Photon. Technol. Lett.* 2011, *23*, 660-662.
- 104 44. Yuan, W.; Webb, D. J.; Kalli, K.; Nielsen, K.; Stefani, A.; Rasmussen, H. K.; Bang, O. 870nm Bragg grating  
105 in single mode TOPAS microstructured polymer optical fibre. *Proc. SPIE* 2011, *7753*, 77538X-1-4.
- 106 45. Wang, T.; Wang, Q.; Luo, Y.; Qiu, W.; Peng, G.-D.; Zhu, B.; Hu, Z.; Zou, G.; Qijin Zhang. Enhancing  
107 photosensitivity in near UV/vis band by doping 9-vinylanthracene in polymer optical fiber. *Opt. Commun.*  
108 2013, *307*, 5-8.
- 109 46. Wang, Q.; Wang, T.; Qiu, W.; Luo, Y.; Zhang, Q.; Zhu, B. Long period fiber gratings in 9-vinylanthracene-  
110 containing core of photosensitive polymer optical fiber. In *Asia Communications and Photonics Conference*,  
111 Guangzhou, China, 07 Nov. 2012; OSA.
- 112 47. Sáez-Rodríguez, D.; Nielsen, K.; Rasmussen, H. K.; Bang, O.; Webb, D. J. Highly photosensitive  
113 polymethyl methacrylate microstructured polymer optical fiber with doped core. *Opt. Lett.* 2013, *38*, 3769-  
114 3772.
- 115 48. Zhou, S. F.; Reekie, L.; Chan, H. P.; Chow, Y. T.; Chung, P. S.; Man Luk, K. Characterization and modeling  
116 of Bragg gratings written in polymer fiber for use as filters in the THz region. *Opt. Express* 2012, *20*, 9564-  
117 9571.



- 118 49. Stefani, A.; Stecher, M.; Town, G. E.; Bang, O. Fiber design and realization of point-by-point written fiber  
119 Bragg gratings in polymer optical fibers. *Proc. SPIE* **2012**, *8426*, 842617-1-7.
- 120 50. Stefani, A.; Stecher, M.; Town, G. E.; Bang, O. Direct writing of fiber Bragg grating in microstructured  
121 polymer optical fiber. *IEEE Photon. Technol. Lett.* **2012**, *24*, 1148-1150.
- 122 51. Yuan, W.; Stefani, A.; Bang, O. Tunable polymer fiber Bragg grating (FBG) inscription: fabrication of dual-  
123 fbg temperature compensated polymer optical fiber strain sensors. *IEEE Photon. Technol. Lett.* **2012**, *24*,  
124 401-403.
- 125 52. Khan, L.; Webb, D.; Kalli, K. Potential for broad range multiplexing of fibre Bragg gratings in polymer  
126 optical fibres and operation in the 700-nm wavelength range, In *Micro-structured and specialty optical fibres*  
127 *II*, Prague, Czech Republic, 15-18 Apr. 2013; SPIE.
- 128 53. Castellon-Urbe, J.; Lomer, M.; Roufael, H.; Lopez-Higuera, J. M. Efficient PF-POF external LPG index  
129 Transducer. In *Workshop on Specialty Optical Fibers and their Applications*, Sigtuna, 28 Mar. 2013; OSA.
- 130 54. Ramakrishnan, R.; Mathews, S.; Rajan, G.; Semenova, Y.; Gerald, F.; Srinivasan, B. Fabrication and  
131 characterization of Bragg gratings in polymer optical fibers using 248 nm irradiation. In *Asia*  
132 *Communications and Photonics Conference 2013*, Beijing, China, 12 Nov. 2013; OSA.
- 133 55. Rajan, G.; Noor, M. Y. M.; Lovell, N. H.; Ambikaizrajah, E.; Farrell, G.; Peng, G.-D. Polymer micro-fiber  
134 Bragg grating. *Opt. Lett.* **2013**, *38*, 3359-3362.
- 135 56. Statkiewicz-Barabach, G.; Tarnowski, K.; Kowal, D.; Mergo, P.; Urbanczyk, W. Fabrication of multiple  
136 Bragg gratings in microstructured polymer fibers using a phase mask with several diffraction orders. *Opt.*  
137 *Express* **2013**, *21*, 8521-8534.
- 138 57. Carlos, A. F. M.; Lúcia, B. B.; Nélia, J. A.; David, J. W.; Rogério, N. N. Inscription of narrow bandwidth  
139 Bragg gratings in polymer optical fibers. *J. Opt.* **2013**, *15*, 075404.
- 140 58. Marques, C. A. F.; Bilro, L. B.; Alberto, N. J.; Webb, D. J.; Nogueira, R. N. Narrow bandwidth Bragg  
141 gratings imprinted in polymer optical fibers for different spectral windows. *Opt. Commun.* **2013**, *307*, 57-  
142 61.
- 143 59. Marques, C. A. F.; Bilro, L.; Webb, D. J.; Nogueira, R. N. Inscription of narrow bandwidth Bragg gratings  
144 in polymer optical fibers. *Proc. SPIE* **2013**, *8794*, 879423-1-4.
- 145 60. Bundalo, I.-L.; Nielsen, K.; Markos, C.; Bang, O. Bragg grating writing in PMMA microstructured  
146 polymer optical fibers in less than 7 minutes. *Opt. Express* **2014**, *22*, 5270-5276.
- 147 61. Bundalo, I.-L.; Nielsen, K.; Markos, C.; Bang, O. PMMA mPOF Bragg gratings written in less than 10 min.  
148 *Proc. SPIE* **2014**, *9128*, 91280O-1-11.
- 149 62. Koerdts, M.; Kibben, S.; Hesselbach, J.; Brauner, C.; Herrmann, A. S.; Vollertsen, F.; Kroll, L. Fabrication  
150 and characterization of Bragg gratings in a graded-index perfluorinated polymer optical fiber. *Procedia*  
151 *Technol.* **2014**, *15*, 138-146.
- 152 63. Sáez-Rodríguez, D.; Nielsen, K.; Bang, O.; Webb, D. J. Photosensitivity mechanism of undoped  
153 poly(methyl methacrylate) under UV radiation at 325 nm and its spatial resolution limit. *Opt. Lett.* **2014**,  
154 *39*, 3421-3424.
- 155 64. Sáez-Rodríguez, D.; Nielsen, K.; Bang, O.; Webb, D. J. Increase of the photosensitivity of undoped  
156 poly(methylmethacrylate) under UV radiation at 325 nm. *Proc. SPIE* **2014**, *9128*, 91280P-1-6.
- 157 65. Kowal, D.; Statkiewicz-Barabach, G.; Mergo, P.; Urbanczyk, W. Microstructured polymer optical fiber for  
158 long period gratings fabrication using an ultraviolet laser beam. *Optics Letters* **2014**, *39*, 2242-2245.
- 159 66. Hu, X.; Pun, C.-F. J.; Tam, H.-Y.; Mégret, P.; Caucheteur, C. Tilted Bragg gratings in step-index polymer  
160 optical fiber. *Opt. Lett.* **2014**, *39*, 6835-6838.
- 161 67. Hu, X.; Pun, C.-F. J.; Tam, H.-Y.; Mégret, P.; Caucheteur, C. Highly reflective Bragg gratings in slightly  
162 etched step-index polymer optical fiber. *Opt. Express* **2014**, *22*, 18807-18817.
- 163 68. Rajan, G.; Noor, M. Y. M.; Ambikairajah, E.; Peng, G. D. Inscription of multiple Bragg gratings in a single-  
164 mode polymer optical fiber using a single phase mask and its analysis. *IEEE Sens. J.* **2014**, *14*, 2384-2388.
- 165 69. Oliveira, R.; Marques, C. A. F.; Bilro, L.; Nogueira, R. N. Production and characterization of Bragg  
166 gratings in polymer optical fibers for sensors and optical communications. *Proc. SPIE* **2014**, *9157*, 915794-  
167 1-4.
- 168 70. Fasano, A.; Woyessa, G.; Stajanca, P.; Markos, C.; Stefani, A.; Nielsen, K.; Rasmussen, H. K.; Krebber, K.;  
169 Bang, O. Production and characterization of polycarbonate microstructured polymer optical fiber Bragg  
170 grating sensor. In *24<sup>th</sup> International Conference on Plastic Optical Fibers*, Nuremberg, Germany, 22-24 Sep.  
171 2015.
- 172 71. Lacraz, A.; Polis, M.; Theodosiou, A.; Koutsides, C.; Kalli, K. Femtosecond laser inscribed Bragg gratings  
173 in low loss CYTOP polymer optical fiber. *IEEE Photon. Technol. Lett.* **2015**, *27*, 693-696.
- 174 72. Kalli, K.; Lacraz, A.; Polis, M.; Othonos, A. Femtosecond laser inscription of Bragg and complex gratings  
175 in coated and encapsulated silica and low-loss polymer optical fibers. *Proc. SPIE* **2015**, *9634*, 96343N-1-4.

- 176 73. Woyessa, G.; Fasano, A.; Stefani, A.; Markos, C.; Nielsen, K.; Rasmussen, H. K.; Bang, O. Humidity  
177 insensitive step-index polymer optical fibre Bragg grating sensors. *Proc. SPIE* **2015**, *9634*, 96342L-1-4.
- 178 74. Fasano, A.; Woyessa, G.; Stajanca, P.; Markos, C.; Stefani, A.; Nielsen, K.; Rasmussen, H. K.; Krebber, K.;  
179 Bang, O. Fabrication and characterization of polycarbonate microstructured polymer optical fibers for  
180 high-temperature-resistant fiber Bragg grating strain sensors. *Opt. Mater. Express* **2016**, *6*, 649-659.
- 181 75. Bundalo, I.-L.; Nielsen, K.; Bang, O. Angle dependent fiber Bragg grating inscription in microstructured  
182 polymer optical fibers. *Opt. Express* **2015**, *23*, 3699-3707.
- 183 76. Bundalo, I. L.; Nielsen, K.; Bang, O. Analysis of the angle dependency in inscription of the fiber Bragg  
184 gratings in the microstructured polymer optical fibers, In *2015 European Conference on Lasers and Electro-*  
185 *Optics*, Munich, 21 Jun. 2015; OSA.
- 186 77. Sáez-Rodríguez, D.; Nielsen, K.; Bang, O.; Webb, D. J. Time-dependent variation of fiber Bragg grating  
187 reflectivity in PMMA-based polymer optical fibers. *Opt. Lett.* **2015**, *40*, 1476-1479.
- 188 78. Oliveira, R.; Bilro, L.; Nogueira, R. Bragg gratings in a few mode microstructured polymer optical fiber in  
189 less than 30 seconds. *Opt. Express* **2015**, *23*, 10181-10187.
- 190 79. Chen, X.; Zhang, W.; Liu, C.; Hong, Y.; Webb, D. J. Enhancing the humidity response time of polymer  
191 optical fiber Bragg grating by using laser micromachining. *Opt. Express* **2015**, *23*, 25942-25949.
- 192 80. Kowal, D.; Statkiewicz-Barabach, G.; Mergo, P.; Urbanczyk, W. Inscription of long period gratings using  
193 an ultraviolet laser beam in the diffusion-doped microstructured polymer optical fiber. *Appl. Opt.* **2015**,  
194 *54*, 6327-6333.
- 195 81. Hu, X.; Kinet, D.; Chah, K.; Mégret, P.; Caucheteur, C. Bragg gratings inscription in step-index PMMA  
196 optical fiber by femtosecond laser pulses at 400 nm. *Proc. SPIE* **2016**, *9916*, 99161X-1-4.
- 197 82. Woyessa, G.; Fasano, A.; Stefani, A.; Markos, C.; Nielsen, K.; Rasmussen, H. K.; Bang, O. Single mode  
198 step-index polymer optical fiber for humidity insensitive high temperature fiber Bragg grating sensors.  
199 *Opt. Express* **2016**, *24*, 1253-1260.
- 200 83. Oliveira, R.; Bilro, L.; Marques, T. H. R.; Napierala, M.; Tenderenda, T.; Mergo, P.; Nasilowski, T.;  
201 Cordeiro, C. M. B.; Nogueira, R. Bragg gratings inscription in highly birefringent microstructured POFs.  
202 *IEEE Photon. Technol. Lett.* **2016**, *28*, 621-624.
- 203 84. Bhowmik, K.; Peng, G.-D.; Luo, Y.; Ambikairajah, E.; Lovric, V.; Walsh, W. R.; Rajan, G. Etching process  
204 related changes and effects on solid-core single-mode polymer optical fibre. *IEEE Photon. J.* **2016**, *8*,  
205 2500109.

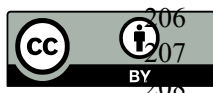

© 2017 by the authors. Submitted for possible open access publication under the terms and conditions of the Creative Commons Attribution (CC-BY) license (<http://creativecommons.org/licenses/by/4.0/>).

209

210
